# Supplementary material for: Design, machine synthesis, and NMR-solution structure of a β-heptapeptide forming a salt-bridge stabilised 314-helix in methanol and in water
Source: Royal Society of Chemistry journal article supplement (doi:10.1039/b101085i), 2001-01-01
Supplement: b101085i.doc [file b101085i.doc]

# Supporting Information

Manuscript: “Design, Machine Synthesis, and NMR-Solution Structure of a -Hepta-peptide Forming a Salt-Bridge Stabilised 314-Helix in Methanol and in Water”

Authors: Per I. Arvidsson, Magnus Rueping and Dieter Seebach*

The following supporting information is available:

1. NMR spectroscopic details
2. Tables of NMR assignment in Methanol and Water
3. Table of NOE’s observed in methanol
4. Concentration dependent CD-spectra of **1** in water at pH 5.5 (0.1M KOAc buffer)

*NMR Spectroscopy of heptapeptide* ***1*** *in methanol:* Sample: 8 mg **1** dissolved in 0.6 ml CD3OH. **1D-NMR** (AMX500): 1H-NMR (500 MHz): suppression of the CD3O*H* signal by presaturation; 90K data points, 128 scans, 5.6 s acquisition time. {1H}-BB-decoupled-13C-NMR (125 MHz): 80 K data points, 20 K scans, 1.3 s acquisition time,1s relax. delay 45° excitation pulse. Processed with 1.0 Hz exponential line broadening. **2D-NMR:** All with solvent suppression by presat. DQF.COSY (500 MHz, CD3OH) with pulsed field gradients (PFG) for coherence pathway selection [1]: *Acquisition:* 2K(t2) x 512 (t1) data points. 8 scans per t1 increment, 0.17 s acquisition time in t2; relaxation delay 2.0 s. TPPI quadrature detection in 1. *Processing:* Zero filling and FT to 1K x 1K real/real datapoints after multiplication with sin2 filter shifted by /3 in 2 and /2 in 1. HSQC with PFG [2] (500, 125 MHz, CD3OH): *Acquisition:* 2K(t2) x 512 (t1) data points, 48 scans per t1 increment. 13C-GARP decoupling during t2. 0.17 s acq. time in t2. *Processing:* Zero filling and FT to 1K x 1K real/real datapoints after multiplication with sin2 filter shifted by /2 in 2 and sin filter shifted by /2 in 1. HMBC with PFG [3] (500, 125 MHz, CD3OH): *Acquisition:* Delay for evolution of long range antiphase magn. 50 ms. No 13C-decoupling, otherwise identical to parameters for HSQC. *Processing:* Zero filling and FT to 1K x 1K after multiplication with cos2 filter in 2 and gaussian filter in 1; power spectrum in both dimensions. ROESY [4] (500 MHz, CD3OH) (see *Table)*. *Acquisition:* 3 ROESY spectra with mixing times of 80, 150 and 300 ms were acquired. CW-spin lock (3.8 kHz) between trim pulses, 2K(t2) x 480 (t1) datapoints, 64 scans per t1-increment. 0.17 s acqu. time in t2, other parameters identical to DQF.COSY. *Processing:* Zero filling and FT to 1K x 512K real/real datapoints after multiplication by cos2 filter in 2 and 1. Baseline correction with 3rd degree polynomial in both dimensions.

*NMR Spectroscopy of the heptaptide* ***1*** *in water:* Sample: 8 mg dissolved in 0.6 ml H2O/D2O buffered at pH 5.5 with 0.1M KOAc-buffer. 1D-NMR (AMX500): **1H-NMR** (500 MHz): suppression of the D2O signal by presaturation; 90K data points, 64 scans, 5.6 s acquisition time. {1H}-BB-decoupled-13C-NMR (125 MHz): 80 K data points, 24 K scans, 1.3 s acquisition time,1s relax. delay 45° excitation pulse. Processed with 1.0 Hz exponential line broadening. **2D-NMR**. All with solvent suppression by presat. DQF.COSY (500 MHz, D2O) with pulsed field gradients (PFG) for coherence pathway selection [27]: *Acquisition:* 2K(t2) x 512 (t1) data points. 8 scans per t1 increment, 0.17 s acquisition time in t2; relaxation delay 2.0 s. TPPI quadrature detection in 1. *Processing:* Zero filling and FT to 1K x 1K real/real datapoints after multiplication with sin2 filter shifted by /3 in 2 and /2 in 1. HSQC with PFG [28] (500, 125 MHz, D2O): *Acquisition:* 2K(t2) x 512 (t1) data points, 48 scans per t1 increment. 13C-GARP decoupling during t2. 0.17 s acq. time in t2. *Processing:* Zero filling and FT to 1K x 1K real/real datapoints after multiplication with sin2 filter shifted by /2 in 2 and sin filter shifted by /2 in 1. HMBC with PFG [29] (500, 125 MHz,D2O): *Acquisition:* Delay for evolution of long range antiphase magn. 50 ms. No 13C-decoupling, otherwise identical to parameters for HSQC. *Processing:* Zero filling and FT to 1K x 1K after multiplication with cos2 filter in 2 and gaussian filter in 1; power spectrum in both dimensions. ROESY [30] (500 MHz,D2O). *Acquisition:* 3 ROESY spectra with mixing times of 80, 150 and 300 ms were acquired. CW-spin lock (3.8 kHz) between trim pulses, 2K(t2) x 480 (t1) datapoints, 64 scans per t1-increment. 0.22 s acqu. time in t2, other parameters identical to DQF.COSY. *Processing:* Zero filling and FT to 1K x 512K real/real datapoints after multiplication by cos2 filter in 2 and 1. Baseline correction with 3rd degree polynomial in both dimensions.

*NMR Structure Determination:* Calculations were performed using *X-PLOR 3.581* [5] on a *Silicon Graphics O2* *(R 10000)* workstation under *Irix 6.3*. Visualisation was carried out using MolMol[6], see *Fig.3.*

Thesimulated annealing protocol of *Quanta 98*, *X-PLOR 3.851* was used to generate the structures starting from a given helical conformation. Initial time: 1000 K, 8000 high steps, 2000 cooling steps, 1.5 fs time step, all other parameters were left unchanged. The resulting structures converged to a left-handed helical structure. A final refinement and energy minimisation starting temp. 300 k, 1 ps time step yielded 30 structures. The obtained structures were analysed using the analyze protocol with the following acceptance criteria: No NOE violations > 0.5 Å, rms difference for bond deviations from ideality < 0.01 Å, rms difference for angle deviations from ideality < 2 °. 25 structures fulfilled this test. We chose this bundle of 25 structures (*Fig. 3*) as representative for the structure in solution.

# Val1 Glu2 Orn3 Val4 Orn5 Glu6 Val7

**Table S1:** Assignment in methanol

| **-Amino acid** | **NH**  ***J (Hz)*** | **2H-C()**  **ax./ekv.** | **C=O** | **H-C()** | **H-C() or 2H-C()** | **2H-C() or Me-C()** | **2H-C()** |
| --- | --- | --- | --- | --- | --- | --- | --- |
| Val 1 | - | 2.86/2.66 |  | 3.55 | 2.08 | 1.10 |  |
|  |  | *36.02* | *172.4* | *56.32* | *32.03* | *19.16* |  |
|  |  |  |  |  |  |  |  |
| Glu 2 | 8.22 | 2.87/2.53 |  | 4.54 | 1.88/1.80 | 2.41 |  |
|  | *8.98Hz* | *41.68* | *173.78* | *47.15* | *32.05* | *31.79* | *177.72* |
|  |  |  |  |  |  |  |  |
| Orn 3 | 8.51 | 2.77/2.49 |  | 4.32 | 1.60/1.54 | 1.69 | 2.99 |
|  | *8.98Hz* | *41.35* | 172.4 | *46.73* | *33.4* | *25.36* | *40.69* |
|  |  |  |  |  |  |  |  |
| Val 4 | 8.24 | 2.54/2.51 |  | 4.22 | 1.75 | 0.94 |  |
|  | *8.61Hz* | *38.40* | *172.66* | *52.83* | *34.3* | *19.37* |  |
|  |  |  |  |  |  |  |  |
| Orn 5 | 7.54 | 2.54/2.31 |  | 4.46 | 1.61/1.51 | 1.74 | 2.94 |
|  | *9.23Hz* | *41.5* | *171.71* | *47.11* | *33.9* | *25.76* | *40.98* |
|  |  |  |  |  |  |  |  |
| Glu 6 | 7.68 | 2.34/2.53 |  | 4.45 | 1.86/1.65 | 2.30 |  |
|  | *9.35Hz* | *41.5* | *171.53* | *46.68* | *31.52* | *31.57* | *177.05* |
|  |  |  |  |  |  |  |  |
| Val 7 | 7.77 | 2.45/2.64 |  | 4.21 | 1.71 | 0.88/0.91 |  |
|  | *9.48Hz* | *37.37* | *175.85* | *52.14* | *33.80* | *18.55/19.20* |  |
|  |  |  |  |  |  |  |  |

# Val1 Glu2 Orn3 Val4 Orn5 Glu6 Val7

**Table S2:** Assignment in water (pH 5.5)

| **-Amino acid** | **NH**  ***J (Hz)*** | **2H-C()**  **ax./ekv.** | **C=O** | **H-C()** | **H-C() or 2H-C()** | **2H-C() or Me-C()** | **2H-C()** |
| --- | --- | --- | --- | --- | --- | --- | --- |
| Val 1 | - | 2.61/2.74 |  | 3.48 | 1.99 | 0.98 |  |
|  |  | *37.24* | *174.28* | *57.10* | *32.84* | *19.96* |  |
|  |  |  |  |  |  |  |  |
| Glu 2 | 8.11 | 2.48/2.53 |  | 4.21 | 1.68/1.83 | 2.20 |  |
|  | *8.86* | *43.55** | *175.25* | *49.60* | *33.69* | *36.48* | *184.48* |
|  |  |  |  |  |  |  |  |
| Orn 3 | 8.18 | 2.53/2.44 |  | 4.17 | 1.52/1.61**** | 1.65 | 2.98 |
|  | *8.98* | *43.55** | *174.58** | *49.11** | *33.99* | *26.29* | *42.07* |
|  |  |  |  |  |  |  |  |
| Val 4 | 7.93 | 2.36/2.52 |  | 4.03 | 1.75 | 0.88 |  |
|  | *9.84* | *40.54* | *175.62* | *55.03* | *34.74* | *21.01* |  |
|  |  |  |  |  |  |  |  |
| Orn 5 | 8.10 | 2.38/2.48 |  | 4.18 | 1.54/1.61**** | 1.16 | 2.98 |
|  | *8.86* | *43.06* | *174.58** | *48.96** | *33.50* | *26.30* | *42.07* |
|  |  |  |  |  |  |  |  |
| Glu 6 | 7.90 | 2.51/2.36 |  | 4.18 | 1.69/1.79 | 2.16 |  |
|  | *9.48* | *43.32* | *174.74* | *49.73* | *33.68* | *36.48* | *184.64* |
|  |  |  |  |  |  |  |  |
| Val 7 | 7.79 | 2.21/2.42 |  | 4.04 | 1.74 | 0.85 |  |
|  | *9.48* | *42.74* | *182.8* | *55.93* | *34.75* | *20.98* |  |
|  |  |  |  |  |  |  |  |
|  |  |  |  |  |  |  |  |

**At the same chemical shift **Only observed in the HSQC- and TOCSY-spectrum*

**Table S3:** NOEs in methanol

|  |  |  |  |
| --- | --- | --- | --- |
| Proton 1 | Proton 2 | NOE |  |
|  |  |  |  |
| a1 | d1 | strong |  |
| a1a | g1 | strong |  |
| a1e | a1a | strong | cal. |
| a2a | a2e | strong | cal. |
| a3e | nh3 | weak |  |
| a3e | a3a | strong | cal. |
| a4 | d4 | strong |  |
| a4a | nh4 | medium |  |
| a7 | d7 | strong |  |
| a7e | g7 | strong |  |
| b1 | a1a | medium |  |
| b1 | a1e | strong |  |
| b1 | g1 | strong |  |
| b1 | d1 | strong |  |
| b2 | a2e | strong |  |
| b2 | d2 | strong |  |
| b2 | g2 | strong |  |
| b3 | e3 | medium |  |
| b3 | a3e | strong |  |
| b3 | d3 | strong |  |
| b3 | d1 | weak |  |
| b3 | a1a | weak |  |
| b4 | a2a | strong |  |
| b4 | g4 | strong |  |
| b4 | d1 | medium |  |
| b4 | d4 | strong |  |
| b4 | g1 | medium |  |
| b5 | a5e | strong |  |
| b5 | d5 | strong |  |
| b5 | g5 | strong |  |
| b6 | a3a | strong |  |
| b6 | a6e | strong |  |
| b6 | g6 | strong |  |
| b6 | d7 | weak |  |
| b7 | a7e | strong |  |
| b7 | a7a | strong |  |
| d6 | g6 | strong |  |
| g3 | nh6 | weak |  |
| g7 | b7 | strong |  |
| nh2 | b2 | medium |  |
| nh2 | b4 | medium |  |
| nh2 | a1a | strong |  |
| nh2 | a1e | medium |  |
| nh2 | d2 | medium |  |
| nh2 | g2 | medium |  |
| nh3 | b5 | medium |  |
| nh3 | b3 | medium |  |
| nh3 | b4 | weak |  |
| nh3 | a2a | strong |  |
| nh3 | a3a | medium |  |
| nh3 | a5e | weak |  |
| nh3 | a4a | medium |  |
| nh3 | d3 | medium |  |
| nh3 | g3 | medium |  |
| nh3 | nh2 | medium |  |
| nh4 | b6 | medium |  |
| nh4 | b4 | medium |  |
| nh4 | a3a | strong |  |
| nh4 | a3e | medium |  |
| nh4 | g4 | medium |  |
| nh4 | d4 | medium |  |
| nh5 | b5 | medium |  |
| nh5 | b7 | medium |  |
| nh5 | a5a | strong |  |
| nh5 | a6a | medium |  |
| nh5 | d5 | medium |  |
| nh5 | g5 | medium |  |
| nh5 | d4 | weak |  |
| nh5 | a7e | strong |  |
| nh6 | b6 | medium |  |
| nh6 | b7 | weak |  |
| nh6 | a5a | medium |  |
| nh6 | a6a | strong |  |
| nh6 | g6 | medium |  |
| nh7 | b6 | weak |  |
| nh7 | b7 | medium |  |
| nh7 | ae7 | medium |  |
| nh7 | a7a | strong |  |
| nh7 | a6a | strong |  |
| nh7 | g7 | medium |  |
| nh7 | d7 | medium |  |


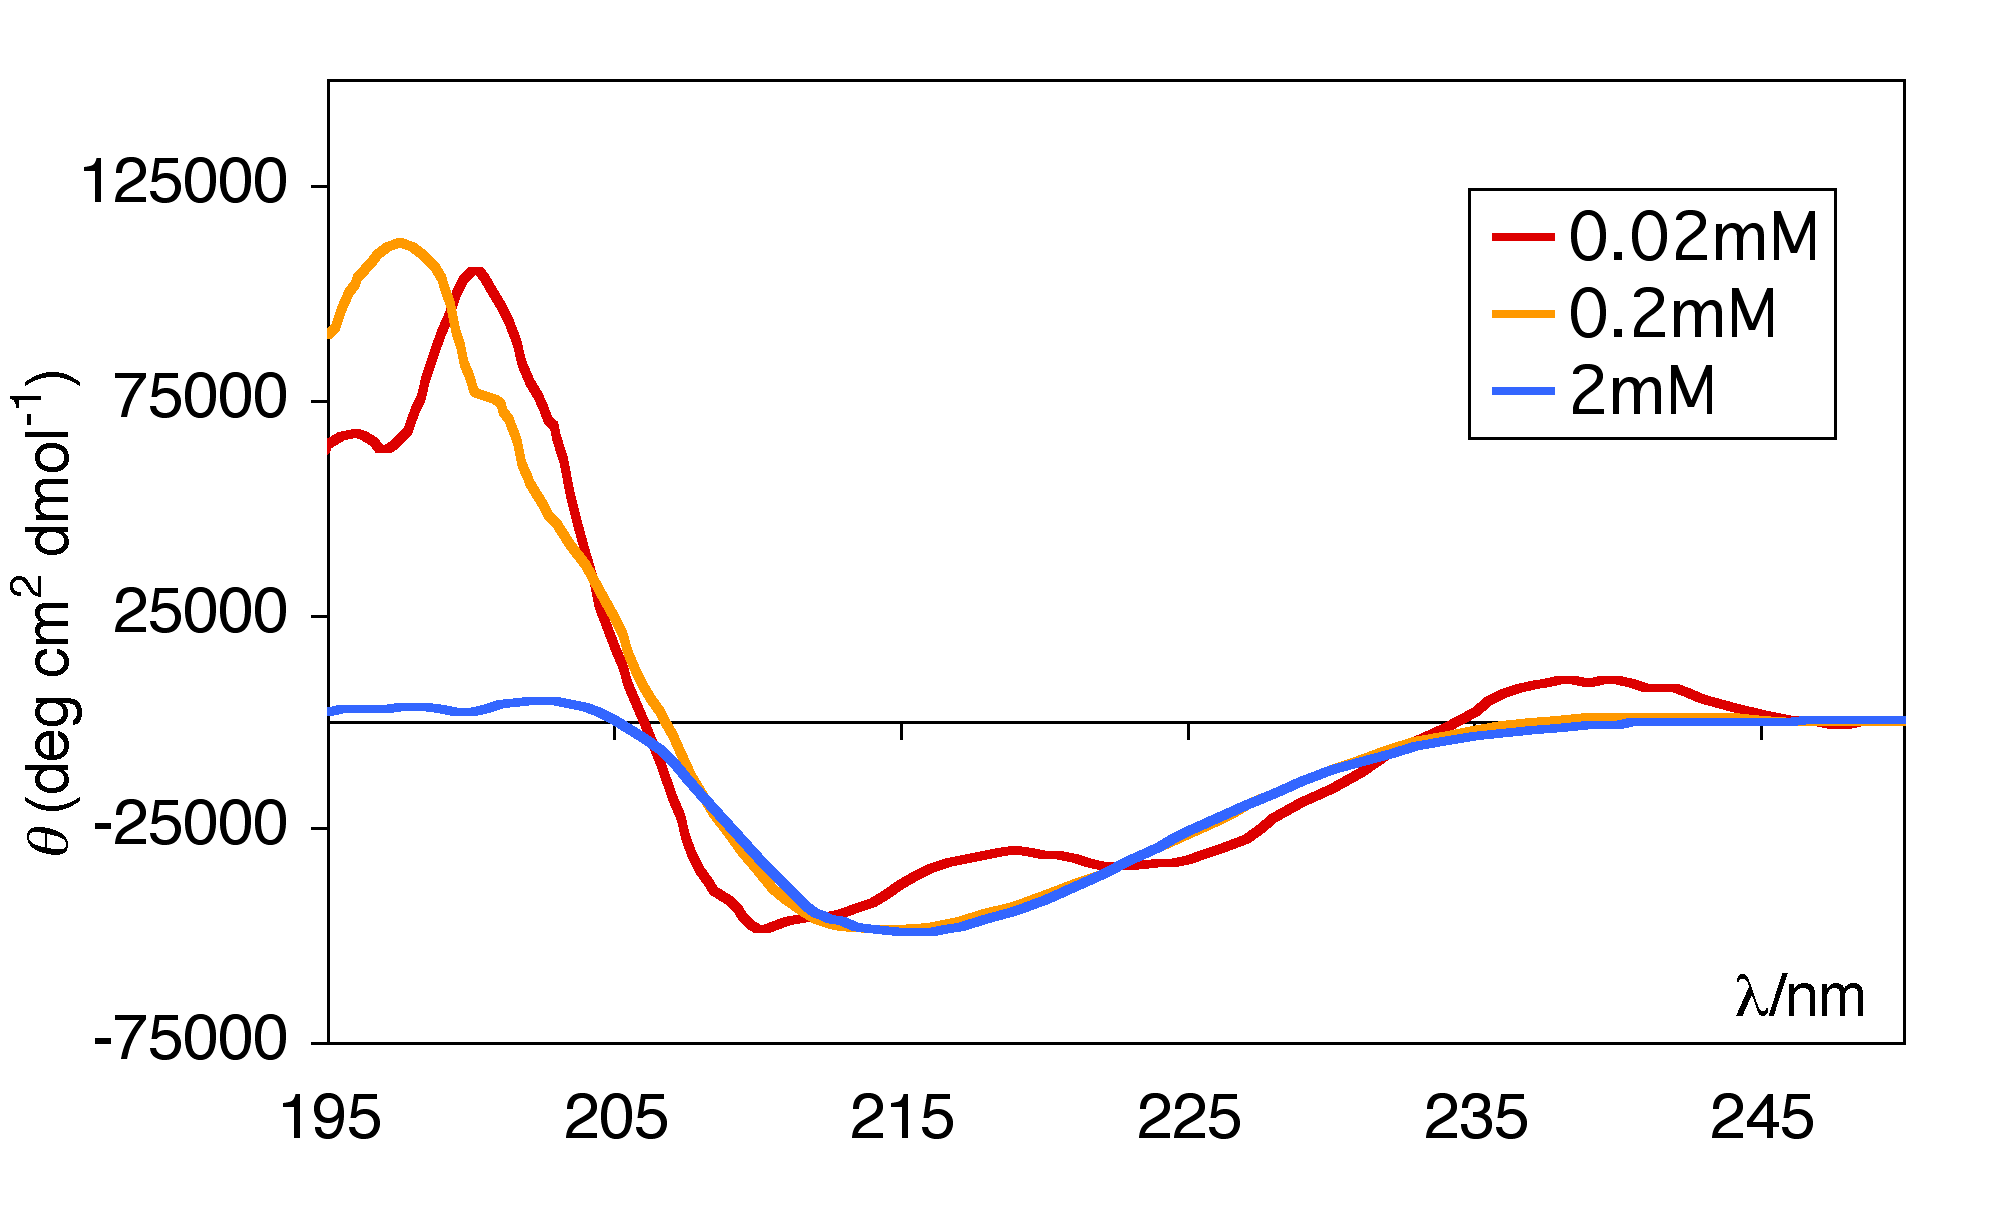
**Figure 1S.** Concentration dependent CD-spectra of **1** in aqueous solution (0.1M KOAc buffer, pH 5.5).

**References:**

[1] A.L. Davis, E.D. Laue, J. Keeler, D. Moskau, J. Lohman, *J. Magn. Reson.* **1991**, *94*, 637.

[2] A.L. Davis, J. Keeler, E.D. Laue, D. Moskau, *J. Magn. Reson*. **1992**, *98*, 207.

[3] W. Willker, D. Leibfritz, R. Kerssebaum, W. Bermel, *Magn. Reson.* *Chem*. **1993**, *31*, 287.

[4] C. Griesinger, R.R. Ernst, *J. Magn. Reson.* **1987**, *75*, 261.

5 A.T. Brünger, in ‘X-PLOR Manual V3.0’, Eds. Y. University, New Haven, 1992.

[6 R. Koradi, M. Billeter, K. Wüthrich, *J. Mol. Graphics* **1996**, *14*, 5
